# Supplementary material for: Potential kidney protection with liraglutide and semaglutide: Exploratory mediation analysis
Source: PubMed Central journal article supplement — Diabetes Obes Metab. 2021 Jun 1;23(9):2058–66. doi: 10.1111/dom.14443 (PMC8453827; doi:10.1111/dom.14443), 2021-06-01
Supplement: DOM-23-2058-s001.pdf [file DOM-23-2058-s001.pdf]

## **Potential kidney protection with liraglutide and semaglutide – exploratory mediation analysis**

Johannes F. E. Mann, MD; John B. Buse, MD; Thomas Idorn, MD; Lawrence A. Leiter, MD; Richard E. Pratley, MD; Søren Rasmussen, PhD; Tina Vilsbøll, MD; Benjamin Wolthers MD; Vlado Perkovic, MD

**Corresponding author:** Johannes F.E. Mann, MD.  
KfH Kidney Centre, 15, Isoldenstrasse, München, 80804, Germany. Email:  
*prof.j.mann@gmail.com*

### **Supplementary appendix**

**Supplementary table S1: Demographics and baseline characteristics of patients in LEADER and SUSTAIN 6**

|                                                                               | LEADER                   |                      | SUSTAIN 6                |                      |
|-------------------------------------------------------------------------------|--------------------------|----------------------|--------------------------|----------------------|
|                                                                               | Liraglutide<br>(n=4,668) | Placebo<br>(n=4,672) | Semaglutide<br>(n=1,648) | Placebo<br>(n=1,649) |
| Age, years                                                                    | 64.2 (7.2)               | 64.4 (7.2)           | 64.7 (7.2)               | 64.6 (7.5)           |
| Female, %                                                                     | 35.5                     | 36.0                 | 38.5                     | 40.0                 |
| HbA <sub>1c</sub> , % [mmol/mol]                                              | 8.7 (1.6) [72]           | 8.7 (1.5) [72]       | 8.7 (1.5) [72]           | 8.7 (1.5) [72]       |
| Systolic blood pressure, mmHg                                                 | 135.9 (17.8)             | 135.9 (17.7)         | 136.0 (17.5)             | 135.3 (16.82)        |
| Diastolic blood pressure, mmHg                                                | 77.2 (10.3)              | 77.0 (10.1)          | 77.0 (10.0)              | 77.1 (10.4)          |
| Heart rate, beats/min                                                         | 72.7 (11.3)              | 72.5 (11.4)          | 72.1 (11.1)              | 72.0 (10.8)          |
| LDL cholesterol, mmol/L                                                       | 2.3 (0.9)                | 2.3 (0.9)            | 2.3 (1.0)                | 2.33 (1.0)           |
| HDL cholesterol, mmol/L                                                       | 1.2 (0.3)                | 1.2 (0.3)            | 1.2 (0.3)                | 1.8 (0.3)            |
| Body weight, kg                                                               | 91.9 (21.2)              | 91.6 (20.8)          | 92.3 (20.7)              | 91.7 (20.6)          |
| BMI, kg/m <sup>2</sup>                                                        | 32.5 (6.3)               | 32.5 (6.3)           | 32.8 (6.3)               | 32.8 (6.2)           |
| eGFR, mL/min/1.73m <sup>2</sup>                                               | 80.2 (27.5)              | 80.6 (27.2)          | 75.9 (25.9)              | 76.4 (27.2)          |
| Normal kidney function or mild impairment (≥60 mL/min/1.73m <sup>2</sup> ), % | 76.1                     | 77.7                 | 71.5                     | 71.5                 |
| Moderate to severe kidney impairment (<60 mL/min/1.73m <sup>2</sup> ), %      | 23.9                     | 22.3                 | 28.5                     | 28.5                 |
| Albuminuria status                                                            |                          |                      |                          |                      |
| Microalbuminuria (UACR 30–300 mg/g), n (%)                                    | 1,223 (26.2)             | 1,233 (26.4)         | 472 (29.2)               | 412 (25.4)           |
| Macroalbuminuria (UACR >300 mg/g), n (%)                                      | 461 (9.9)                | 505 (10.8)           | 196 (12.1)               | 224 (13.8)           |
| History of cardiovascular disease                                             |                          |                      |                          |                      |
| Myocardial infarction                                                         | 1,434 (30.7)             | 1,373 (29.4)         | 530 (32.2)               | 542 (32.9)           |
| Stroke                                                                        | 512 (11.0)               | 526 (11.3)           | 178 (10.8)               | 205 (12.4)           |
| Revascularization                                                             | 142 (3.0)                | 153 (3.3)            | 58 (3.5)                 | 54 (3.3)             |
| >50% artery stenosis                                                          | 1,187 (25.4)             | 1,191 (25.5)         | 567 (34.4)               | 600 (36.4)           |
| Heart failure NYHA II–III                                                     | 653 (14.0)               | 652 (14.0)           | 285 (17.3)               | 289 (17.5)           |
| Duration of diabetes, years                                                   | 12.8 (8)                 | 12.9 (8.1)           | 14.2 (8.2)               | 13.6 (8.0)           |
| Insulin-naïve, %                                                              | 56.3                     | 54.4                 | 52.5                     | 53.4                 |
| Current or previous smoker, %                                                 | 58.2                     | 59                   | 54.3                     | 55.1                 |

Data are mean (SD) unless otherwise stated.

BMI, body mass index; eGFR, estimated glomerular filtration rate; HbA<sub>1c</sub>, glycated haemoglobin; HDL, high density lipoprotein; LDL, low density lipoprotein; NYHA, New York Heart Association; SD, standard deviation; UACR, urinary albumin-to-creatinine ratio.

**Supplementary table S2: Vansteelandt modelling for mediation of time to first kidney outcome with liraglutide versus placebo for additional mediators in LEADER**

| Variable                 | Estimated probability of no event at 36 months |         |                                                       |                                                        | Percentage mediation, % (95% CI) |
|--------------------------|------------------------------------------------|---------|-------------------------------------------------------|--------------------------------------------------------|----------------------------------|
|                          | Liraglutide                                    | Placebo | Total treatment effect liraglutide – placebo (95% CI) | Direct treatment effect liraglutide – placebo (95% CI) |                                  |
| Diastolic blood pressure | 0.958                                          | 0.940   | 0.018 (0.009; 0.027)                                  | 0.018 (0.009, 0.027)                                   | None*<br>-0.4 (-4.0; 3.2)        |
| Haemoglobin              | 0.958                                          | 0.940   | 0.018 (0.009; 0.028)                                  | 0.017 (0.008, 0.027)                                   | 4.2 (1.2; 11.6)                  |
| Heart rate               | 0.958                                          | 0.940   | 0.018 (0.009; 0.027)                                  | 0.020 (0.010, 0.029)                                   | None*<br>-10.2 (-30.7; 2.7)      |
| LDL cholesterol          | 0.958                                          | 0.940   | 0.018 (0.009; 0.028)                                  | 0.018 (0.009, 0.028)                                   | None*<br>-0.1 (-1.6; 1.1)        |
| Total cholesterol        | 0.958                                          | 0.940   | 0.018 (0.009; 0.027)                                  | 0.018 (0.009, 0.028)                                   | None*<br>-0.6 (-6.6; 1.4)        |
| White blood cell count   | 0.958                                          | 0.940   | 0.018 (0.008; 0.027)                                  | 0.018 (0.009, 0.027)                                   | 0.1 (-6.3; 0.5)                  |

95% CI calculated using bootstrap (N=1,000).

\*A negative percentage of mediation is a numerical result from the analysis, and it is interpreted as no mediation.

CI, confidence interval; LDL, low-density lipoprotein.

**Supplementary table S3: Vansteelandt modelling for mediation of time to first kidney outcome with semaglutide versus placebo for additional mediators in SUSTAIN 6**

| Variable                 | Estimated probability of no event at 24 months |         |                                              |                                               | Percentage mediation, % |
|--------------------------|------------------------------------------------|---------|----------------------------------------------|-----------------------------------------------|-------------------------|
|                          | Semaglutide                                    | Placebo | Total treatment effect semaglutide – placebo | Direct treatment effect semaglutide – placebo |                         |
| Diastolic blood pressure | 0.966                                          | 0.939   | 0.027                                        | 0.025                                         | 6.8                     |
| Haemoglobin              | 0.963                                          | 0.938   | 0.025                                        | 0.022                                         | 11.4                    |
| Heart rate               | 0.964                                          | 0.940   | 0.024                                        | 0.026                                         | None* (–8.1)            |
| LDL cholesterol          | 0.966                                          | 0.939   | 0.027                                        | 0.024                                         | 11.1                    |
| Total cholesterol        | 0.965                                          | 0.938   | 0.026                                        | 0.024                                         | 9.1                     |
| White blood cell count   | 0.946                                          | 0.937   | 0.027                                        | 0.026                                         | 1.9                     |

\*A negative percentage of mediation is a numerical result from the analysis, and it is interpreted as no mediation.  
LDL, low-density lipoprotein.
